# Supplementary material for: Novel Role for Tranilast in Regulating NLRP3 Ubiquitination, Vascular Inflammation, and Atherosclerosis
Source: PubMed Central journal article supplement — J Am Heart Assoc. 2020 Jun 1;9(12):e015513. doi: 10.1161/JAHA.119.015513 (PMC7429049; doi:10.1161/jaha.119.015513), 2020-06-01
Supplement: JAH3-9-e015513-s001.pdf [file JAH3-9-e015513-s001.pdf]

# **Supplemental Material**

**Figure S1. The specificity of the immunohistochemical staining.**

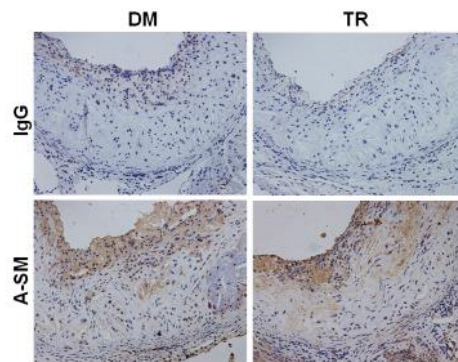

The aortic sinuses were stained with anti- $\alpha$ -SMA or control IgG to examine the specificity of immunohistochemical staining. Ig, immunoglobulin;  $\alpha$ -SMA,  $\alpha$ -smooth muscle actin; DM, vehicle containing DMSO; TR, tranilast.

**Figure S2. The role for mouse sex in TR inhibition of the initiation and progression atherosclerosis.**

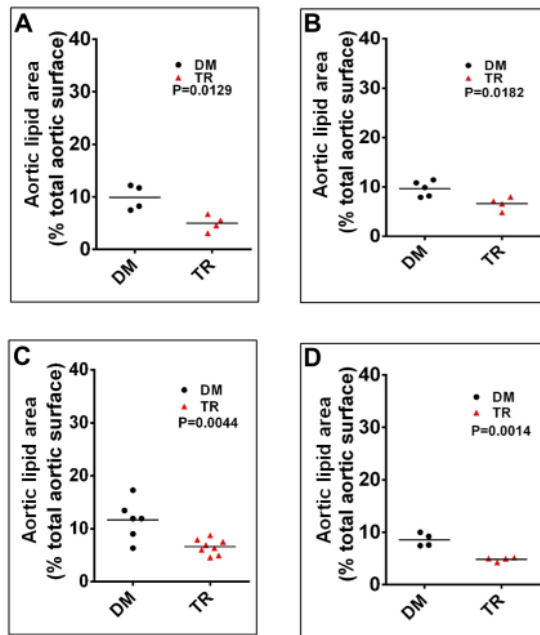

The regimen for treatment of male (A) and female (B) ApoE<sup>-/-</sup> mice with TR was shown in Figure 6. The regimen for treatment of male (C) and female (D) ApoE<sup>-/-</sup> mice with TR was depicted in Figure 7. The atherosclerotic lesions in the whole aortas were visualized by Oil Red O staining. The lesional size of the aortas was measured and analyzed as indicated. DM, vehicle containing DMSO; TR, tranilast.
